# Supplementary material for: Understanding the factors that govern the deposition and morphology of thin films of ZnO from aqueous solution
Source: Royal Society of Chemistry journal article supplement (doi:10.1039/b404784b), 2004-01-01
Supplement: b404784b.pdf [file b404784b.pdf]

## Supporting Data

**Table A.** Thermodynamic data used with SPECIES for CBD-ZnO systems.<sup>1,2</sup>

|                               | Zn <sup>2+</sup>                                                                                                                                                                            | H <sup>+</sup>                                           |
|-------------------------------|---------------------------------------------------------------------------------------------------------------------------------------------------------------------------------------------|----------------------------------------------------------|
| OH <sup>-</sup>               | log K <sub>1</sub> = 5.04 (-8.96)*<br>log β <sub>2</sub> = 11.1 (-16.9)*<br>log β <sub>3</sub> = 13.6 (-28.4)*<br>log β <sub>4</sub> = 14.8 (-41.2)*<br>log K <sub>so</sub> = -16.9 (11.1)* |                                                          |
| en                            | log K <sub>1</sub> = 5.7<br>log β <sub>2</sub> = 10.6<br>log β <sub>3</sub> = 12.6                                                                                                          | log K <sub>1</sub> = 10.44<br>log β <sub>2</sub> = 17.83 |
| TEA                           | log K <sub>1</sub> = 2.05<br>log β <sub>2</sub> = 3.28                                                                                                                                      | log K <sub>1</sub> = 8.03                                |
| HMT <sup>3</sup>              | log K <sub>1</sub> = 1.8                                                                                                                                                                    | log K <sub>1</sub> = 4.89                                |
| NH <sub>3</sub>               | log K <sub>1</sub> = 2.35<br>log β <sub>2</sub> = 4.80<br>log β <sub>3</sub> = 7.31<br>log β <sub>4</sub> = 9.46                                                                            | log K <sub>1</sub> = 9.46                                |
| AcO <sup>-</sup>              | log K <sub>1</sub> = 1.9<br>log β <sub>2</sub> = 3.4<br>log β <sub>3</sub> = 4.1                                                                                                            | log K <sub>1</sub> = 4.75                                |
| HCOO <sup>-</sup>             | log K <sub>1</sub> = 0.70<br>log β <sub>2</sub> = 1.08<br>log β <sub>3</sub> = 1.20                                                                                                         | log K <sub>1</sub> = 3.75                                |
| Cl <sup>-</sup>               | log K <sub>1</sub> = 0.46                                                                                                                                                                   | log K <sub>1</sub> = -6.1                                |
| NO <sub>3</sub> <sup>-</sup>  | log K <sub>1</sub> = 0.11<br>log β <sub>2</sub> = -0.82<br>log β <sub>3</sub> = -0.6<br>log β <sub>4</sub> = -1.3                                                                           | log K <sub>1</sub> = -1.44                               |
| SO <sub>4</sub> <sup>2-</sup> | log K <sub>1</sub> = 0.70<br>log β <sub>2</sub> = 0.69<br>log β <sub>3</sub> = 0.9<br>log β <sub>4</sub> = 0.85<br>log β <sub>5</sub> = 1.04                                                | log K <sub>1</sub> = 1.89                                |

## References

- <sup>1</sup> L.D Pettit and K.J Powell, *SPECIES, Academic Software*, 1999.
- <sup>2</sup> 'The IUPAC Stability Constants Database, Academic Software and IUPAC', 1997.
- <sup>3</sup> U.I Isaeva and B.I Imanakunov, *Inst. Neorg. Fiz. Khim.*, 1982, 4, 46.

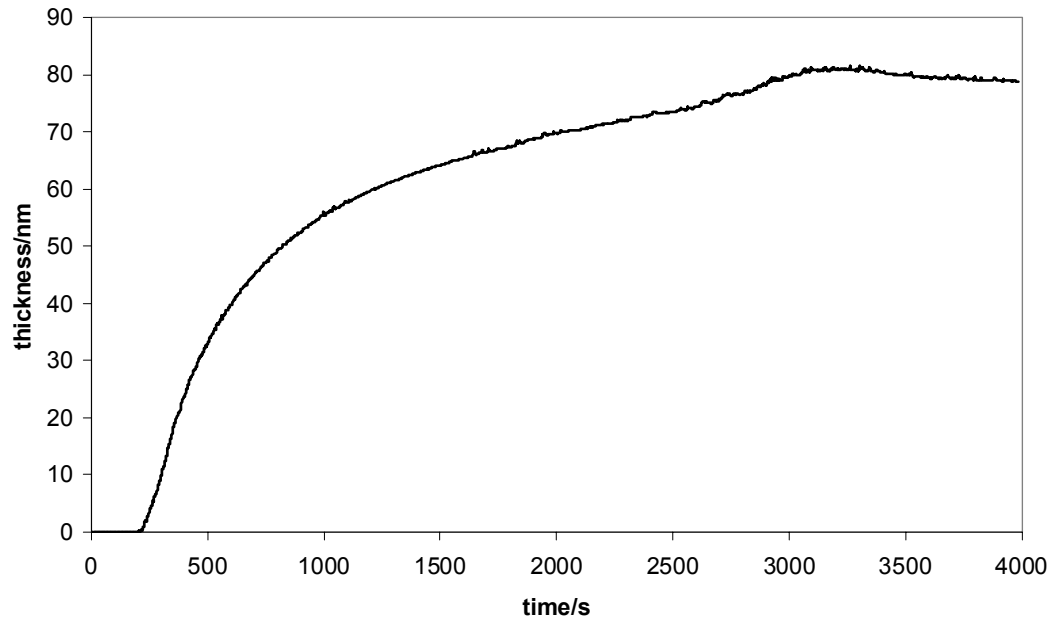

**Figure A:** Film thickness profile as a function of deposition time for Zn-en system.

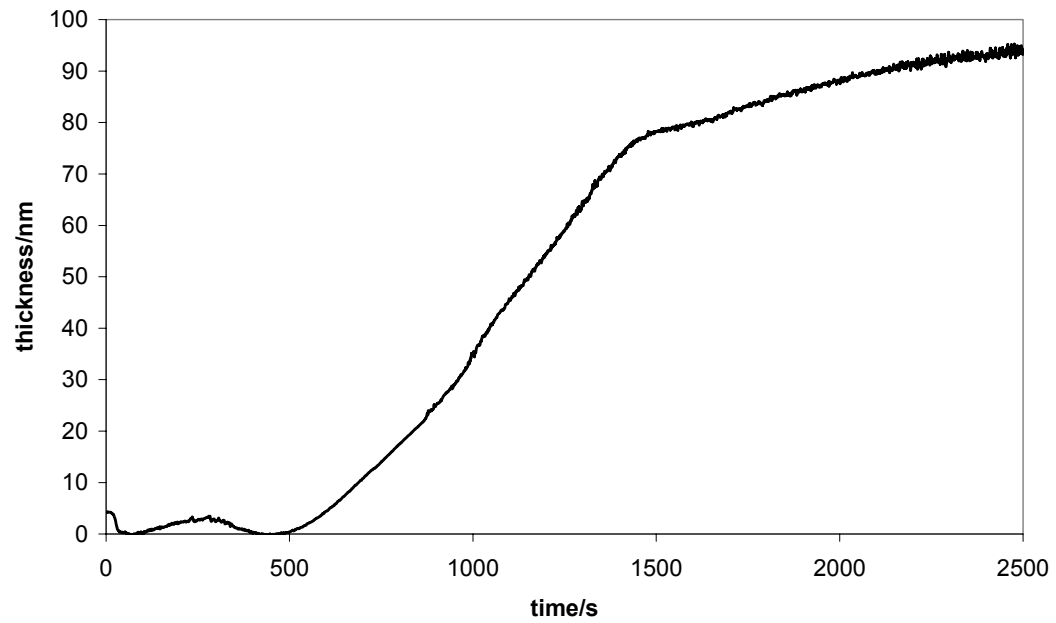

**Figure B:** Film thickness profile as a function of deposition time for Zn-TEA system.

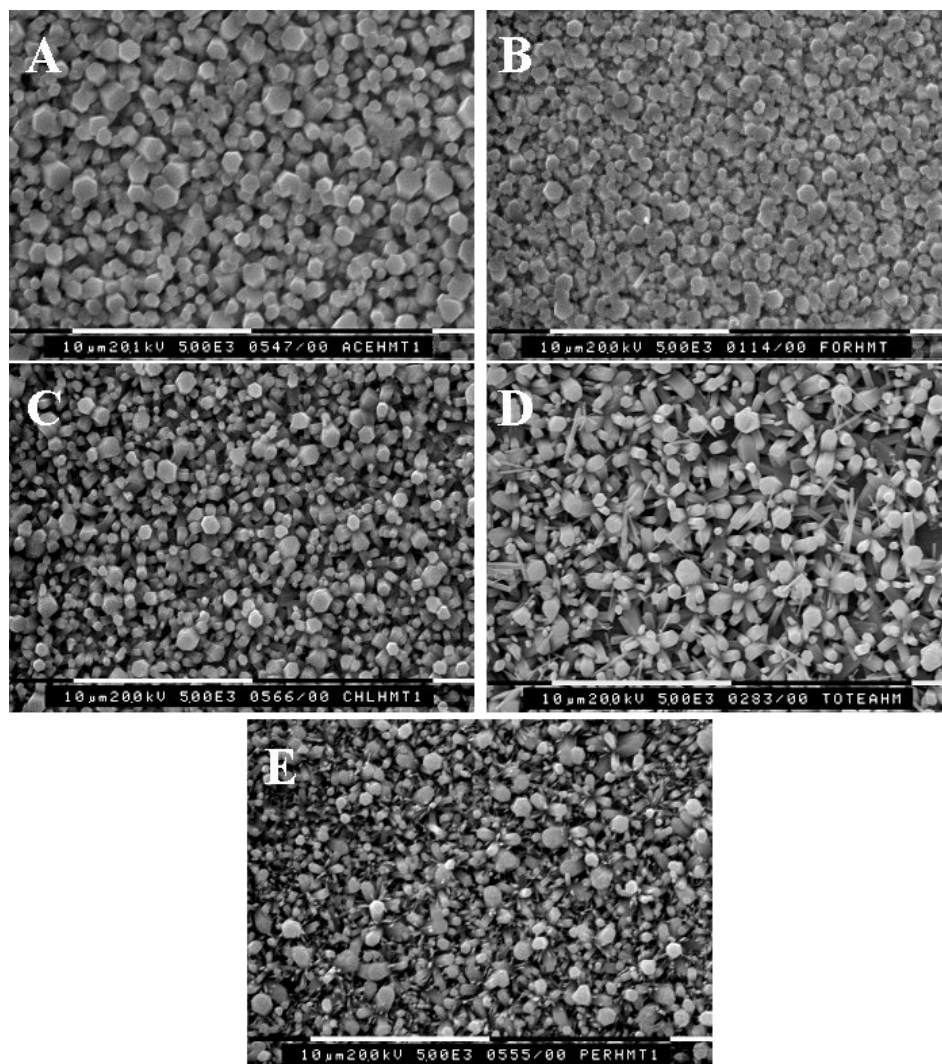

**Figure C.** SEM images of ZnO films on ZnO template layers from HMT baths ( $0.025 \text{ mol dm}^{-3}$  zinc salt and  $0.025 \text{ mol dm}^{-3}$  HMT, pH 5,  $90 \text{ }^\circ\text{C}$ , 1 h); *a.*  $\text{Zn}(\text{CH}_3\text{COO})_2$ ; *b.*  $\text{Zn}(\text{HCOO})_2$ ; *c.*  $\text{ZnCl}_2$ ; *d.*  $\text{Zn}(\text{NO}_3)_2$ ; *e.*  $\text{Zn}(\text{ClO}_4)_2$ . Films obtained from baths containing acetate, formate and chloride are more homogeneous than those containing perchlorate and nitrate.

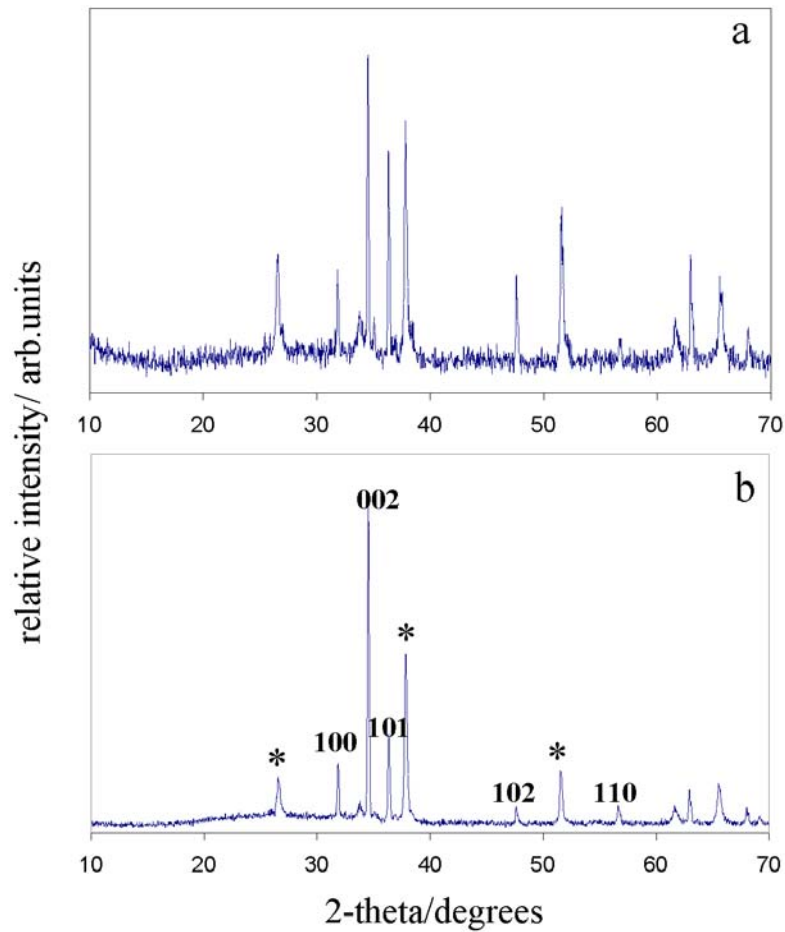

**Figure D:** X-ray diffraction studies of microcolumns ZnO grown on *a.* ZnO template layers on TO(F)-glass *b.* Au/TO(F)-glass. Peaks indexed as zincite (JCPDS 36-1451) with strong preferred orientation in the [002] direction *i.e.* along the *c*-axis of the wurtzite (HCP structure). \*Signals arising from TO(F) glass.

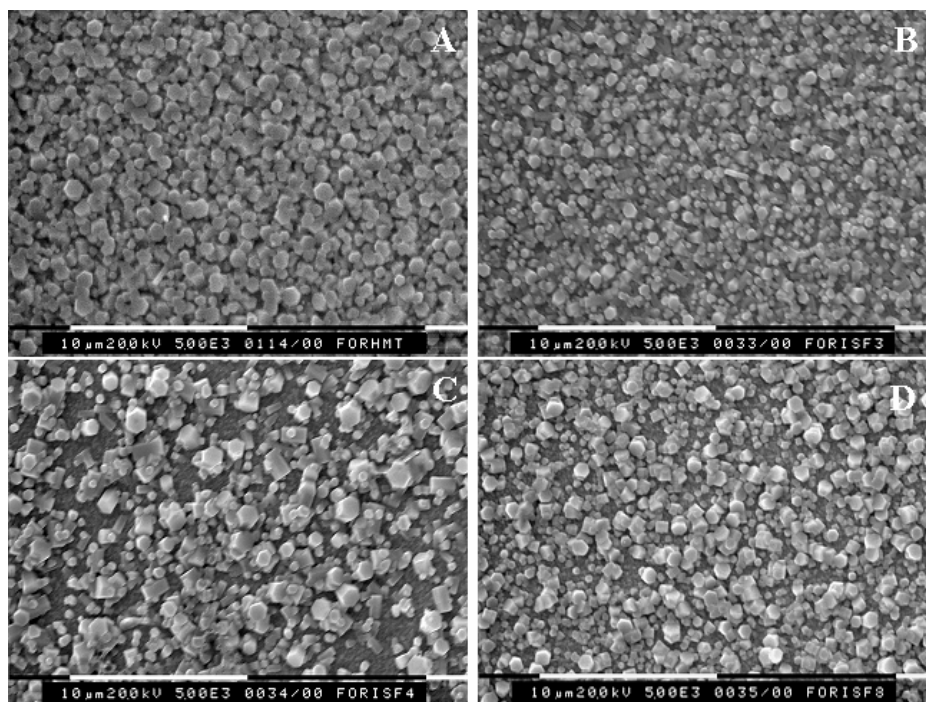

**Figure E.** SEM images showing the effect of increasing ionic strength on growth of ZnO films (on template layers) deposited from baths (pH 5, 1 hr) containing HMT ( $0.025 \text{ mol dm}^{-3}$ ) and  $\text{Zn}(\text{HCOO})_2$  ( $0.025 \text{ mol dm}^{-3}$ ). The ionic strength was varied using [KCl]: *a.*  $0 \text{ mol dm}^{-3}$ ; *b.*  $0.05 \text{ mol dm}^{-3}$ ; *c.*  $0.075 \text{ mol dm}^{-3}$ ; *d.*  $0.3 \text{ mol dm}^{-3}$ .

**Table B.** Rod dimensions of ZnO films deposited on microcrystalline ZnO templates for different deposition times.

| time /min | average rod width / $\mu\text{m}$ | average rod length/ $\mu\text{m}$ |
|-----------|-----------------------------------|-----------------------------------|
| 2         | 0.3                               | not determined                    |
| 5         | 0.5                               | not determined                    |
| 10        | 0.5                               | not determined                    |
| 20        | 0.75                              | ~1.25                             |
| 30        | 0.75                              | ~1.5                              |
| 60        | ~1                                | ~2                                |

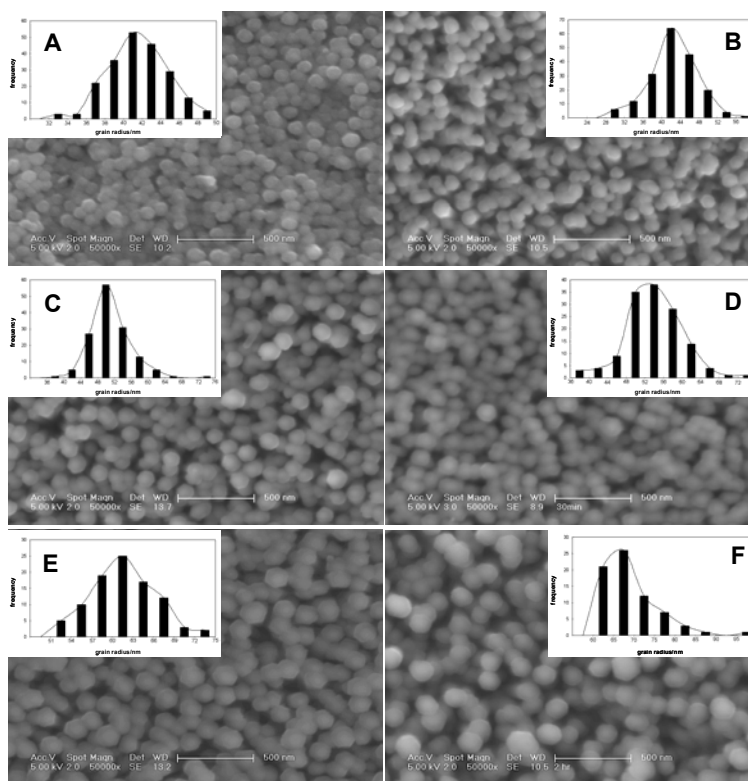

**Figure F.** SEM images and grain size distribution histograms of ZnO films from HMT baths ( $0.025 \text{ mol dm}^{-3} \text{ Zn}(\text{CH}_3\text{COO})_2$  and  $0.025 \text{ mol dm}^{-3}$  HMT) deposited on ZnO nanocrystalline template layers deposited for: *a.* 5 min; *b.* 10 min; *c.* 20 min; *d.* 30 min; *e.* 1 hr; *f.* 2hr.

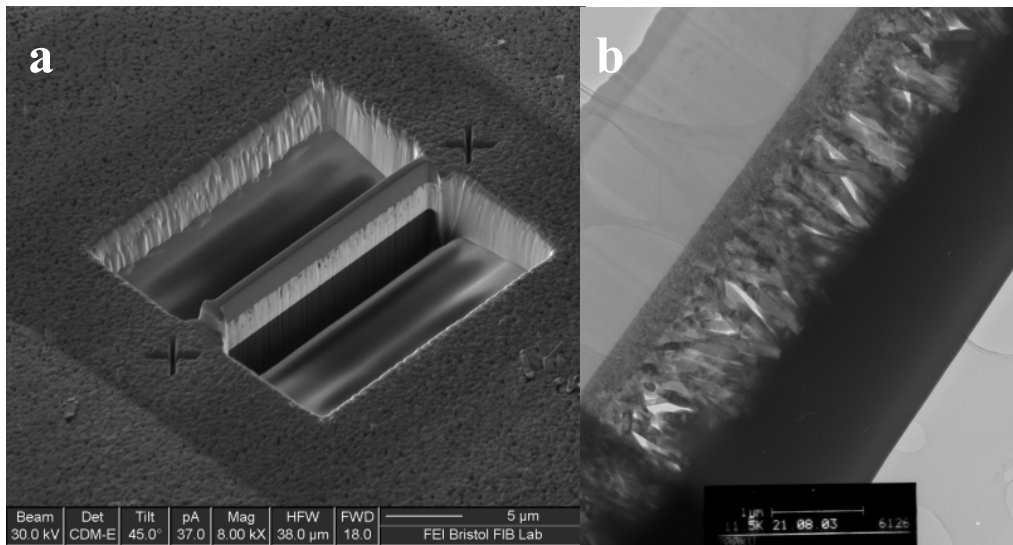

**Figure G.** *a.* Micrograph of ZnO thin film sample (deposited by Method 2) prepared by FIB methods (before final cut and lift out process) for HR-TEM. *b.* Cross sectional TEM (mag. x 11.5 K) of ZnO thin film sample (Method 1)
